# Supplementary material
Source: Springer Nature journal article supplement (https://www.springermedizin.de/resource/supplementary/13058_2013_3419_MOESM11_ESM.pdf/9704106)

Progeny of ER sorted cells in vitro

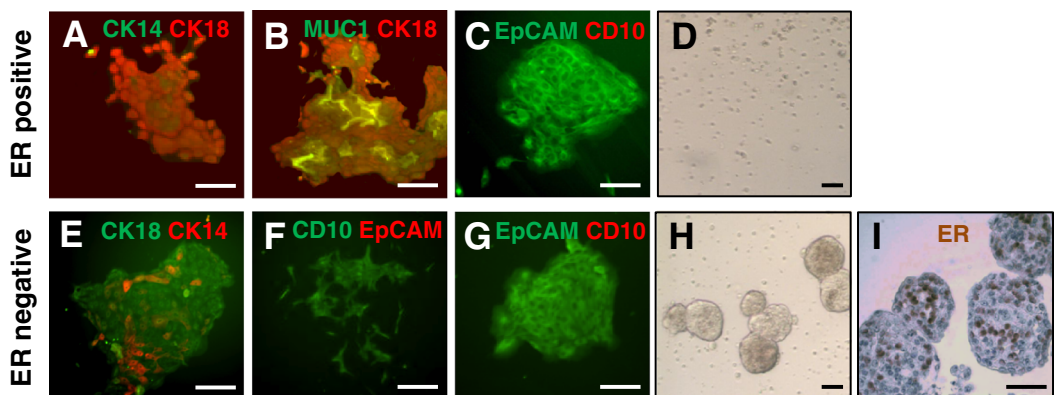

Progeny of ER sorted cells in vivo

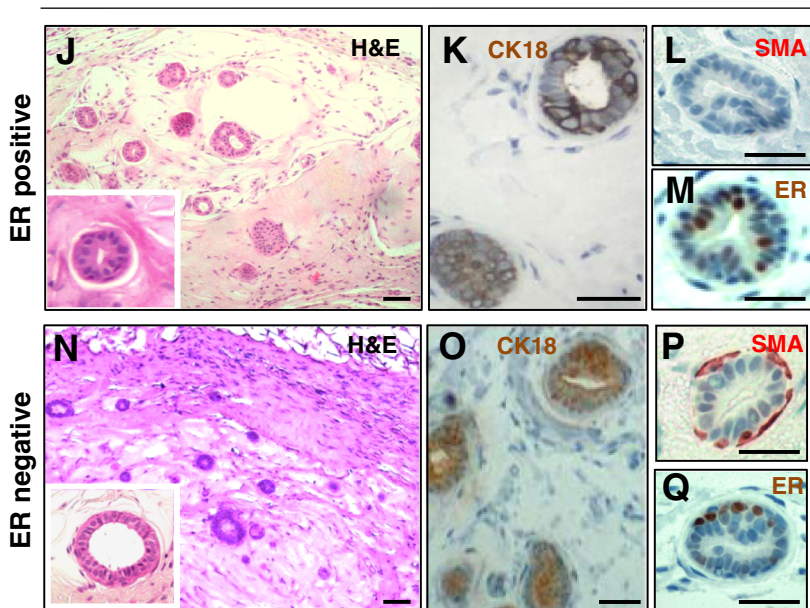

**R**

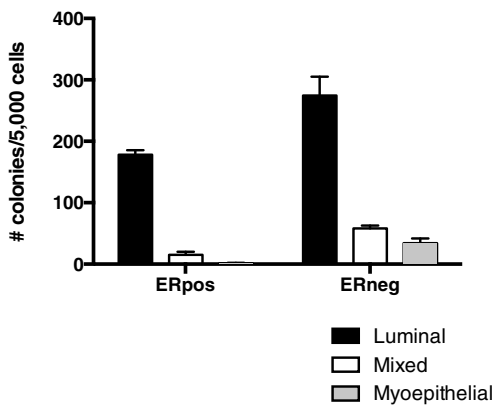

**S**

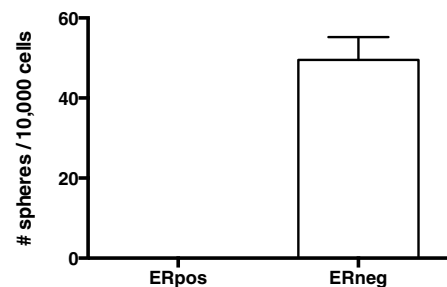

Supplement: MOESM11 [file 9704106]
